# Supplementary material for: A Comparative Review of Alternative Fuels for the Maritime Sector: Economic, Technology, and Policy Challenges for Clean Energy Implementation
Source: MDPI journal article supplement (doi:10.3390/world2040029), 2021-10-21
Supplement: s1 [file s1]

# **Supplementary material for “A Comparative Review of Alternative Fuels for the Maritime Sector: Challenges for Clean Energy Implementation in Economic, Technology and Policy”**

## **Fuel cell**

Hydrogen can be consumed by gas turbines and internal combustion engines, however, electricity production with the use of intermediate mechanical energy conversion may result in a low efficiency. The fuel cell is currently recognised as the most efficient way to consume hydrogen onboard ship due to the electrochemical kinetics of hydrogen [1]. Utilising hydrogen onboard with fuel cell systems is already commercially available, with examples of hydrogen-powered ships including Nemo H<sub>2</sub>, FCS Alsterwasser and SF-BREEZEas [2][3][4]. When consuming pure hydrogen in a fuel cell, both fuel cells show a similar efficiency of approximately 40–60% depending on the fuel purity, with water the only by-product generated from the process in addition to heat [5][6][7][8]. Hydrogen is a compatible fuel with the major fuel cell systems excluding DMFC. PEMFC is an ideal solution for consuming hydrogen onboard due to the low operating temperature (65–85°C) and maturity in application [9][10][11][12]. However, PEMFC can only be operated with pure hydrogen which limits the use of PEMFC to small size ferry ships and yacht. Regarding the low energy density issue brought by the challenges in storage of hydrogen onboard, the application of MCFC and SOFC systems with higher energy density fuels is currently under investigation and has been seen as a solution for long-distance shipping [13].

Among all hydrocarbons, natural gas is one of the most attractive fuels for direct operation on fuel cells, because it is one of the most widespread alternative fuels, cheap, and its simple molecular structure poses lesser challenges than heavier hydrocarbons. Direct-methane SOFCs have been the focus of considerable attention in the 21<sup>st</sup> century. Nickel-based anodes are currently the most common anode used for SOFC due to its low cost and excellent catalytic properties for the reforming and electrochemical reactions [14]. Experimental research has indicated that SOFCs with Ni-based anodes can be operated stably with methane at intermediate temperatures (600–800°C) [15][16][17]. The most critical challenge arising from direct feed of methane to SOFC is the faster cell degradation due to carbon deposition at the anode. Surface carbon can largely reduce the efficiency of the system by blocking the access of reactants to reaction sites [18]. In recent years, effort has been devoted to improving the anode activity and stability of SOFC with natural gas fuel including incorporating an additional functional layer on Ni-based anodes [19][20][21], incorporating Sn addition to the nickel-based anode [22][23], and alternative anodes for direct-methane SOFCs [24][25][26].

Methanol can be consumed as a direct fuel or raw material for hydrogen production. In fuel processor–fuel cell systems, methanol will be first converted into hydrogen rich gas through steam reforming, or partial oxidation, or autothermal reforming. The converting process can be conducted either in a separate processing system or integrated within the fuel cell system. Then, the H<sub>2</sub> rich gas will be fed to the fuel cell to generate electricity after remove impurities present in the source fuel. High-temperature fuel cells, such as HT-PEMFC and SOFC, are more suitable for the application of methanol in the fuel processor–fuel cell systems [27][28][29][30]. The high-temperature fuel cells have a better capability of thermally integrated methanol reforming and more manageable tolerance against fuel contaminants with a high efficiency (30–50%). In addition, methanol can also be directly consumed in the direct methanol fuel cells (DMFCs) without reforming. However, the problems that occur in DMFC including unfavourable methanol crossover, poor oxidation kinetics and low activity catalysts lead to a poor efficiency of the system (20-30%) [31][32].

The last selected alternative fuel tested with FC is ammonia. Ammonia is easy to be cracked into hydrogen at high temperature. The thermal decomposition of ammonia is starting at 405°C and almost complete conversion can be achieved at temperatures above 590°C [33][34]. Therefore, one of the main options for the direct use of ammonia as fuel is the SOFC. The normal working temperature of SOFC is in the range of 650°C to 850°C and the decomposition of ammonia can take place in the fuel cell. Another advantage of utilising ammonia with SOFC is no high cost catalysts are required to reach high conversion of ammonia. Numerous studies have been conducted on the thermal decomposition of ammonia with different catalysts. Nickel and yttria stabilised zirconia (YSZ) has been proven to be a very efficient catalyst and over 90% ammonia cracking can be achieved for ammonia SOFC at a working temperature of 800°C [35][36][37][38]. Experimental test results also indicated that NO<sub>x</sub> emissions in the off-gas of ammonia SOFC can be prevented when the iron-based catalyst has been used as anode in SOFC [39][40]. Another FC that attract attention from researchers is alkaline electrolyte direct ammonia fuel cells, it is reported that one of the earliest alkaline electrolyte direct ammonia fuel cells were investigated in the 1960s [41]. Alkaline electrolyte direct ammonia fuel cells can be operated at low or medium level temperatures because the ammonia in the anode is reacting directly with hydroxide ions through the alkaline membrane instead of cracking ammonia into hydrogen. However, the issues of low catalytic activity of the electro-catalysts and the difficulty of ammonia oxidation at low temperatures are the key barriers for alkaline electrolyte direct ammonia fuel cell to consume ammonia at a high efficiency [42]. Up to date experimental results indicated that the performance of alkaline electrolyte direct ammonia full cell (15-30%) is worse than SOFC (30-60%) [43][44][45][46]. Recent studies showed the possibility of improving the efficiency of membrane electrolyte direct ammonia full cell, a newly designed anion conducting electrolyte based 5-cell direct type fuel cell stack has been reported to reach the energy efficiency of 52.4% with ammonia [47].

### **Internal combustion engine**

To consume LNG fuel, ships are required to have a gas-powered energy system which generally composed of the fuel storage system, the engine system, the bunker station, the pipe system and

generator sets. Depending on the working principle and the fuel type consumed by the main engine, its systems used by LNG-fuelled vessels can generally be classified into two groups dual-fuel systems and pure gas system. One main characteristic of the dual-fuel energy systems used on board is the two independent fuel storages and supply systems. The concept behind this design is to allow the ship to switch flexibly between consuming conventional fuel oil and LNG fuel. The dual-fuel system can run in either diesel or gas mode. In gas mode, fuel oil is used only as 'pilot oil' and the total amount of fuel oil in this mode is less than 1 per cent of total fuel [48]. A pure-gas system is today commonly used by inland waterway or costal working vessels. The design of low-pressure four-stroke pure-gas engines is very similar to that of the four-stroke dual-fuel engine, but it can operate only in gas mode. The cycle Otto/Miller is the basis for the operation of this engine. In the pure-gas system, the pure-gas engine system uses a spark plug to ignite the fuel gas in the combustion chamber [49].

One of the most attractive advantages of biodiesel as an alternative fuel is that it can be consumed directly in existing diesel-based internal combustion. However, the challenges and difficulties are also associated with the use of biodiesel like cold start problems, low calorific value, difficulty in fuel pumping lead by high viscosity [50]. These problems can be solved by mixing biodiesel with diesel fuel. Currently, primary marine engine makers, such as MAN, Wärtsilä, Yanmar, Cummins, Caterpillar, etc., have claimed that their engines can use 5-30% and even up to 100% biodiesel blends with or without engine modifications [51].

Existing studies showed that ammonia can be implemented as fuel along or blended with other fuels in either spark-ignition (SI) or compression-ignition (CI) combustion schemes. However, the combustion properties of ammonia have led to some technological barriers to effectively consuming ammonia in engine systems, such as high auto-ignition temperature, narrow flammability limits, low flame speed and toxicity [52]. Experimental results from [53] indicated that limited by the low flame speed utilising ammonia independently in SI engine will result in deterioration in engine performance due to incomplete combustion. There are several studies investigated the use of pure ammonia in CI engine, for example, [54], [52] and [55]. However, the outcomes of the studies were disappointed. Compressions ignition of pure ammonia in existing diesel engines is difficult to achieve since the high auto-ignition temperature and narrow flammability limits. The test results showed that successful ammonia compression ignition operation could only be observed under extremely high compression ratios from 35:1 to 100:1 [56]. To circumvent the challenges associated with the unfavourable combustion properties of ammonia, the combination of ammonia with combustion promoters has been adopted to improve the combustibility of ammonia. Hydrogen and diesel are the most commonly used combustion promoter blend with ammonia [57][58][59][60][61]. [62] investigated the performance of ammonia/hydrogen mixtures as a fuel in an SI-engine system. The authors reported that blended 10 vol.% hydrogen with ammonia has significantly lowered the ignition compression ratio to 8.9:1 from 35:1 for pure ammonia at the engine speed of 1200 rpm. Ammonia fuelled marine engine has not been commercialised yet, Wärtsilä is planned to test the world first full-scale ammonia engine in Stord, Norway during the first quarter of 2021[63].

## Battery-powered system

Battery as the main source of power is the key of pure battery-powered vessels. The Nickel manganese cobalt oxide (NMC) based Li-ion cell, Lithium iron phosphate (LFP) cell, Nickel Cobalt Aluminium (NCA) cell are considered as the most suitable types of battery for full electricity ships with compromise between the most important parameters of energy density, costs, safety, availability and lifetime [64]. Recent studies and attempts made by the industry indicated that the implementation of battery storage technologies onboard can be technically and economically feasible [65][66][67][68][69][70][71]. Nevertheless, energy storage capacity and recharging speed of electricity storage systems have been and continues to be the limiting factors for large ships. For large ocean-going vessels, batteries are currently only used as backup power or supplementary in the hybrid system [72]. An increasing number of studies are currently taking place and looking deeply into solid-state battery technology [73][74]. The combination of solid-state battery with metal-air could dramatically improve the specific energy, energy density and safety of the cell [75]. We have reason to believe that when these technologies have matured, vessels will be able to sail longer distances with pure electricity supply and increase ship size for pure battery power application.

## Reference

1. Han, J.; Charpentier, J. F.; Tang, T.; State of the art of fuel cells for ship applications. In 2012 IEEE International Symposium on Industrial Electronics, Hangzhou, China, 28-31 May 2012; pp. 1456-1461.
2. Zemships. One Hundred Passengers and Zero Emissions: The First Ever Passenger Vessel to Sail Propelled by Fuel Cells. European Commission **2008**. Available online: [https://ec.europa.eu/environment/life/project/Projects/index.cfm?fuseaction=home.showFile&rep=file&fil=Zemships\\_Brochure\\_EN.pdf](https://ec.europa.eu/environment/life/project/Projects/index.cfm?fuseaction=home.showFile&rep=file&fil=Zemships_Brochure_EN.pdf) (accessed on 21 April 2021).
3. Chakraborty, S.; Dzielendziak, A.S.; Körösglu, T.; Yang, K. Evaluation of Smart Eco-Friendly Public Transport Options in Coastal Cities: Towards a Green Future for the City of Southampton. Sheno, R.A., Wilson, P.A. and Bennett, S.S. Eds.; University of Southampton: Southampton, UK, 2013.
4. Pratt, J.W.; Klebanoff, L.E. Feasibility of the SF-BREEZE: A Zero-Emission, Hydrogen Fuel Cell, High-Speed Passenger Ferry; SANDIA Report; SAND2016-9719; Sandia National Laboratories: Livermore, CA, USA, 2016.
5. Huo, S.; Jiao, K.; Park, J. W. On the water transport behavior and phase transition mechanisms in cold start operation of PEM fuel cell. *Applied Energy* **2019**, 233–234, 776-788.
6. Kim, H. Y.; Jeon, S.; Song, M.; Kim, K. Numerical simulations of water droplet dynamics in hydrogen fuel cell gas channel. *Journal of Power Sources* **2014**, 246, 679-695.
7. Zhu, L.; Swaminathan, V.; Gurau, B.; Masel, R. I.; Shannon, M. A. An onboard hydrogen generation method based on hydrides and water recovery for micro-fuel cells. *Journal of Power Sources* **2009**, 192(2), 556-561.
8. Kirubakaran, A.; Jain, S.; Nema, R. k. A review on fuel cell technologies and power

- electronic interface. *Renewable and Sustainable Energy Reviews* **2009**, 13(9), 2430-2440.
9. Biert, L. V.; Godjevac, M.; Visser, K.; Aravind, P.V.; A review of fuel cell systems for maritime applications, *Journal of Power Sources* **2016**, 327, 345-364.
  10. Çögenli, M.; Mukerjee, S.; Yurtcan, A.B.; Membrane electrode assembly with ultra low platinum loading for cathode electrode of PEM fuel cell by using sputter deposition. *Fuel Cells* **2015**, 15 (2), 288-297.
  11. Ganesan, A.; Narayanasamy, M. Ultra-low loading of platinum in proton exchange membrane-based fuel cells: a brief review. *Mater Renew Sustain Energy* **2019**, 8, 18.
  12. Brodt, M.; Wycisk, R.; Pintauro, P.N. Nanofiber electrodes with low platinum loading for high power hydrogen/air PEM fuel cells. *Journal of The Electrochemical Society* **2013**, 160, F744–F749.
  13. Xing, H.; Stuart, C.; Spence, S.; Chen, H. Fuel Cell Power Systems for Maritime Applications: Progress and Perspectives. *Sustainability* **2021**, 13(3), 1213.
  14. Li, P.; et al., Effect of Sn addition on improving the stability of Ni-Ce<sub>0.8</sub>Sm<sub>0.2</sub>O<sub>1.9</sub> anode material for solid oxide fuel cells fed with dry CH<sub>4</sub>. *Catalysis Today*, **2019**, 330, 209-216.
  15. Tu, B. High performance of direct methane-fuelled solid oxide fuel cell with samarium modified nickel-based anode. *International Journal of Hydrogen Energy* **2020**, 45(51), 27587-27596.
  16. Ideris, A.; Croiset, E.; Pritzker, M.; Amin, A. Direct-methane solid oxide fuel cell (SOFC) with Ni-SDC anode-supported cell. *International Journal of Hydrogen Energy* **2017**, 42(36), 23118-23129.
  17. Zhu, H.; Wang, W.; Ran, R.; Shao, Z. A new nickel–ceria composite for direct-methane solid oxide fuel cells. *International Journal of Hydrogen Energy* **2013**, 38(9), 3741-3749.
  18. Ye, X. F.; et al., Research of carbon deposition formation and judgment in Cu-CeO<sub>2</sub>-ScSZ anodes for direct ethanol solid oxide fuel cells. *International Journal of Hydrogen Energy* **2012**, 37, 505-510.
  19. Kim, J. W.; et al., Three-dimensional thermal stress analysis of the re-oxidized Ni-YSZ anode functional layer in solid oxide fuel cells. *Journal of Alloys and Compounds* **2018**, 752, 148-154.
  20. Liu, Z.; et al., Development of three-layer intermediate temperature solid oxide fuel cells with direct stainless steel based anodes. *International Journal of Hydrogen Energy* **2012**, 37 (5), 4401-4405.
  21. Chen, Y.; et al., Direct-methane solid oxide fuel cells with hierarchically porous Ni-based anode deposited with nanocatalyst layer. *Nano Energy* **2014**, 10, 1-9.
  22. Yang, Q.; Chen, J.; Sun, C.; Chen, L. Direct operation of methane fueled solid oxide fuel cells with Ni cermet anode via Sn modification. *International Journal of Hydrogen Energy* **2016**, 41, 11391-11398.
  23. Kan, H.; Lee, H. Sn-doped Ni/YSZ anode catalysts with enhanced carbon deposition resistance for an intermediate temperature SOFC. *Applied Catalysis B: Environmental* **2010**, 97(1–2), 108-114.
  24. Yang, Y.; et al., PengCo-substituted Sr<sub>2</sub>Fe<sub>1.5</sub>Mo<sub>0.5</sub>O<sub>6-δ</sub> as anode materials for solid oxide fuel cells: achieving high performance via nanoparticle exsolution. *Journal of Power Sources* **2019**, 438, 226989.
  25. Yuan, X.; et al., Utilization of low-concentration coal-bed gas to generate power using a

- core-shell catalyst-modified solid oxide fuel cell. *Renew Energy* **2020**, 147, 602-609.
26. Yao, T.; et al., Enhanced activity and stability of  $\text{Sr}_2\text{FeMo}_{0.65}\text{Ni}_{0.35}\text{O}_{6-\delta}$  anode for solid oxide fuel cells with Na doping. *Journal of Power Sources* **2019**, 425, 103-109.
27. Xu, Q.; Ni, M. Modelling of high temperature direct methanol solid oxide fuel cells. *International Journal of Energy Research* **2021**, 45(2), 3097-3112.
28. Cocco, D.; Tola, V.; Comparative Performance Analysis of Internal and External Reforming of Methanol in SOFC-MGT Hybrid Power Plants. *Journal of Engineering for Gas Turbines and Power* **2007**, 129(2), 478-487.
29. Chougule, A.; Sonde, R. R. Modelling and experimental investigation of compact packed bed design of methanol steam reformer. *International Journal of Hydrogen Energy* **2019**, 44 (57), 29937-29945.
30. Ribeirinha, P.; Schuller, G.; Boaventura, M.; Mendes, A. Synergetic integration of a methanol steam reforming cell with a high temperature polymer electrolyte fuel cell. *International Journal of Hydrogen Energy* **2017**, 42(19), 13902-13912.
31. Ye, F.; et al. Mechanism and kinetic study of pulse electrodeposition process of Pt/C catalysts for fuel cells. *Renew Energy* **2020**, 145, 514-520.
32. Alias, M.S.; Kamarudin, S. K.; Zainoodin, A. M.; Masdar, M.S. Active direct methanol fuel cell: An overview. *International Journal of Hydrogen Energy* **2020**, 45 (38), 19620-19641.
33. Maffei, N.; Pelletier, L.; McFarlan, A. A high performance direct ammonia fuel cell using a mixed ionic and electronic conducting anode. *Journal of Power Sources* **2008**, 175, 221-225.
34. Meng, G.; Jiang, C.; Ma, J.; Ma, Q.; Liu, X. Comparative study on the performance of a SDC-based SOFC fueled by ammonia and hydrogen. *Journal of Power Sources* **2007**, 173, 189-193.
35. Ilbas, M.; et al., Numerical investigation of a direct ammonia tubular solid oxide fuel cell in comparison with hydrogen. *International Journal of Hydrogen Energy* **2020**, 45(60), 35108-35117.
36. Stoeckl, B. Characterization and performance evaluation of ammonia as fuel for solid oxide fuel cells with Ni/YSZ anodes. *Electrochimica Acta* **2019**, 298, 2019, 874-883.
37. Miyazaki, K.; et al., Development of Ni-Ba(Zr,Y)O<sub>3</sub> cermet anodes for direct ammonia-fueled solid oxide fuel cells. *Journal of Power Sources* **2017**, 365, 148-154.
38. Wang, W.; et al., Ammonia-mediated suppression of coke formation in direct-methane solid oxide fuel cells with nickel-based anodes. *Journal of Power Sources* **2013**, 240, 232-240.
39. Ma, Q.; Ma, J.; Zhou, S.; Yan, R.; Gao, J.; Meng, G. A high-performance ammonia-fueled SOFC based on a YSZ thin-film electrolyte. *Journal of Power Sources* **2007**, 164, 86-89.
40. Fournier, G.G.M.; Cumming, I.W.; Hellgardt, K. High performance direct ammonia solid oxide fuel cell, *Journal of Power Sources* **2006**, 162(1), 198-206.
41. Lan, R.; Tao, S.; Ammonia as a Suitable Fuel for Fuel Cells. *Frontiers in Energy Research* **2014**, 2, 35.
42. Guo, Y.; Pan, Z.; An, L. Carbon-free sustainable energy technology: Direct ammonia fuel cells, *Journal of Power Sources* **2020**, 476, 228454.
43. Siddiqui, O.; Ishaq, H.; Dincer, I. Experimental investigation of improvement capability of ammonia fuel cell performance with addition of hydrogen. *Energy Conversion and*

- Management* **2020**, 205, 112372.
44. Siddiqui, O.; Dincer, I. \*b Experimental investigation and assessment of direct ammonia fuel cells utilizing alkaline molten and solid electrolytes. *Energy* **2019**, 169, 914-923.
  45. Wang, Y.; et al., Efficient and durable ammonia power generation by symmetric flat-tube solid oxide fuel cells. *Applied Energy* **2020**, 270, 115185.
  46. Hamed, K.H.M.; Dincer, I. A new direct ammonia solid oxide fuel cell and gas turbine based integrated system for electric rail transportation. *eTransportation* **2019**, 2, 100027.
  47. Siddiqui, O.; Dincer, I. \*a Development and performance evaluation of a direct ammonia fuel cell stack. *Chemical Engineering Science* **2019**, 200, 285-293.
  48. Sharafian, A.; Blomerus, P.; Mérida, W. Natural gas as a ship fuel: Assessment of greenhouse gas and air pollutant reduction potential. *Energy Policy* **2019**, 131, 332-346.
  49. Boulougouris, E. K.; Chrysinas, L.E. LNG Fueled Vessels Design Training. University of Strathclyde Glasgow **2015**. Available online: <https://www.onthemosway.eu/wp-content/uploads/2015/06/Lecture-Notes.pdf> (accessed on 23 May 2021).
  50. Singh, D.; Sharma, D.; Soni, S.L.; Sharma, S.; Kumari, D.; Chemical compositions, properties, and standards for different generation biodiesels: A review. *Fuel* **2019**, 253, 60-71.
  51. Noor, C.W.; Noor, M.M.; Mamat, R. Biodiesel as alternative fuel for marine diesel engine applications: A review. *Renewable and Sustainable Energy Reviews* **2018**, 94, 127-142.
  52. Reiter, A.J.; Kong, S.C. Demonstration of compression-ignition engine combustion using ammonia in reducing greenhouse gas emissions. *Energy Fuels* **2008**, 22, 2963-2971.
  53. Grannell, S.M.; Assanis, D.N.; Bohac, S.V.; Gillespie, D.E. The fuel mix limits and efficiency of a stoichiometric, ammonia, and gasoline dual fueled spark ignition engine. *Journal of Engineering for Gas Turbines and Power* **2008**, 130, 42802.
  54. Ryu, K.; Zacharakis-Jutz, G.E.; Kong, S.C. Effects of gaseous ammonia direct injection on performance characteristics of a spark-ignition engine. *Apply Energy* **2014**, 116, 206-215.
  55. Pochet, M.; et al., Experimental and numerical study, under LTC conditions, of ammonia ignition delay with and without hydrogen addition. *Proceedings of the Combustion Institute* **2019**, 37(1), 621-629.
  56. Dimitriou, P.; Javaid, R. A review of ammonia as a compression ignition engine fuel, *International Journal of Hydrogen Energy* **2020**, 45(11), 7098-7118.
  57. Frigo, S.; Gentili, R. Analysis of the behaviour of a 4-stroke Si engine fuelled with ammonia and hydrogen. *International Journal of Hydrogen Energy* **2013**, 38, 3, 1607-1615.
  58. Comotti, M.; Frigo, S. Hydrogen generation system for ammonia-hydrogen fuelled internal combustion engines. *International Journal of Hydrogen Energy* **2015**, 40 (33), 10673-10686.
  59. Westlye, F.R.; Ivarsson, A.; Schramm, J.; Experimental investigation of nitrogen based emissions from an ammonia fueled SI-engine. *Fuel* **2013**, 111, 239-247.
  60. Niki, Y.; Yoo, D.; Hirata, K.; Sekiguchi, H. Effects of Ammonia Gas Mixed Into Intake Air on Combustion and Emissions Characteristics in Diesel Engine. In proceedings of the ASME 2016 Internal Combustion Engine Division Fall Technical Conference. Greenville, South Carolina, USA. October 9–12, 2016.

61. Lhuillier, C.; Brequigny, P.; Contino, F.; Rousselle, C. Experimental study on ammonia/hydrogen/air combustion in spark ignition engine conditions. *Fuel* **2020**, 269, 117448.
62. Mørch, C.S.; Bjerre, A.; Gøttrup, M.P.; Sorenson, S.C. Schramm, J. Ammonia/hydrogen mixtures in an SI-engine: Engine performance and analysis of a proposed fuel system. *Fuel* **2011**, 90 (2), 854-864.
63. Wärtsilä, World's first full scale ammonia engine test - an important step towards carbon free shipping. Wärtsilä, **2020**, Available online: <https://www.wartsila.com/media/news/30-06-2020-world-s-first-full-scale-ammonia-engine-test---an-important-step-towards-carbon-free-shipping-2737809>. (accessed on 26 April 2021).
64. DNV, study electrical energy storage for ships. DNV 2020. Available online: <http://www.emsa.europa.eu/publications/reports/download/6186/3895/23.html> (accessed 25 May 2020).
65. Lisbona, D.; Snee, T. A review of hazards associated with primary lithium and lithium-ion batteries. *Process Safety and Environmental Protection* **2011**, 89(6), 434 - 442.
66. Wang, X.; Zhang, Y.; Li, Y.; Zhang, H. Vanadium flow battery technology and its industrial status. *Energy Storage Science and Technology* **2015**, 4, 458-466.
67. Hou, J.; Sun, J.; Hofmann, H. Mitigating Power Fluctuations in Electrical Ship Propulsion Using Model Predictive Control with Hybrid Energy Storage System. In Proceedings of the 2014 American Control Conference (ACC), Portland, Oregon, USA, 4-6 June 2014; pp. 4366- 4371.
68. Kim, K.; Park, K.; Lee, J.; Chun, K.; Lee, S. Analysis of Battery/Generator Hybrid Container Ship for CO<sub>2</sub> Reduction. *IEEE Access*, **2018**, 6, 14537-14543.
69. Kumar, D.; Zare, F. A Comprehensive Review of Maritime Microgrids: System Architectures, Energy Efficiency, Power Quality, and Regulations. *IEEE Access* **2019**, 7, 67249-67277.
70. Jeong, B.; Jeon, H.; Kim, S.; Kim, J.; Zhou, P. Evaluation of the Lifecycle Environmental Benefits of Full Battery Powered Ships: Comparative Analysis of Marine Diesel and Electricity. *Journal of Marine Science and Engineering* **2020**, 8(8), 580.
71. Ovrum, E.; Bergh, T.F. Modelling lithium-ion battery hybrid ship crane operation. *Applied Energy* **2015**, 152, 162-172.
72. Al-Falahi, M. D. A.; et al., Techno-Economic Feasibility Study of Battery- Powered Ferries. In the proceeding of the 2018 IEEE 4th Southern Power Electronics Conference (SPEC), Singapore, 10-13 Dec. 2018, pp. 1-7.
73. Pfenninger, R.; et al., A low ride on processing temperature for fast lithium conduction in garnet solid-state battery films. *Natural Energy* **2019**, 4, 475–483.
74. Wang, Z.; et al., Low Resistance – Integrated All – Solid – State Battery Achieved by Li<sub>7</sub>La<sub>3</sub>Zr<sub>2</sub>O<sub>12</sub> Nanowire Upgrading Polyethylene Oxide (PEO) Composite Electrolyte and PEO Cathode Binder. *Advanced Functional Materials* **2019**, 29(1), 1805301.
75. Su, C.; et al., Atomic Modulation of FeCo – Nitrogen – Carbon Bifunctional Oxygen Electrodes for Rechargeable and Flexible All – Solid – State Zinc – Air Battery. *Advanced Functional Materials* **2017**, 7(13), 1602420.
